# Supplementary material for: Comprehensive Preterm Breast Milk Metabotype Associated with Optimal Infant Early Growth Pattern
Source: PubMed Central journal article supplement (PMC6470768; doi:10.3390/nu11030528), 2019-02-28

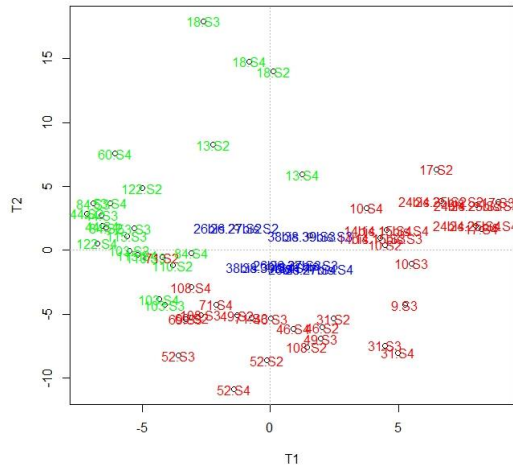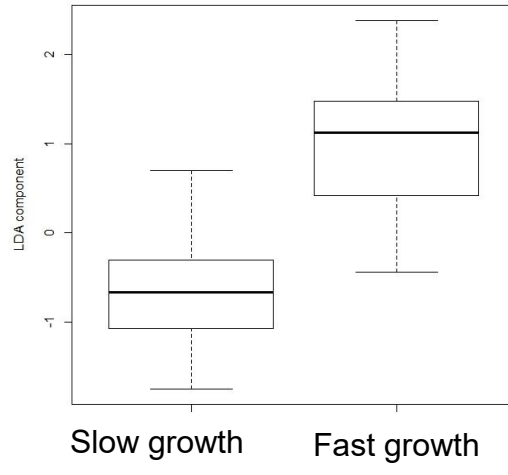

Supplement: nutrients-11-00528-s001.pdf [file nutrients-11-00528-s001.pdf]
